# Supplementary material for: Improving AlphaFold2-based protein tertiary structure prediction with MULTICOM in CASP15
Source: PubMed Central journal article supplement (PMC10484931; doi:10.1038/s42004-023-00991-6), 2023-09-07
Supplement: 42004_2023_991_MOESM2_ESM.pdf [file 42004_2023_991_MOESM2_ESM.pdf]

## Supplementary Information

**Supplementary Table 1.** The performance of the top 20 out of 47 CASP15 server predictors, quantified by the average GDT-TS of the top 1 model submitted by the server predictors for the 68 full-length targets, 31 TBM full-length targets and 37 FM full-length targets (a target is classified as a FM target if one of its domains is FM/TBM or FM domain). NBIS-AF2-standard is the standard AlphaFold2 predictor.

|     | Server predictors  | Avg. GDT-TS on 68 targets | Avg. GDT-TS on 31 TBM targets | Avg. GDT-TS on 37 FM targets |
|-----|--------------------|---------------------------|-------------------------------|------------------------------|
| 162 | UM-TBM             | 0.7898                    | 0.8821                        | 0.7126                       |
| 229 | Yang-server        | 0.785                     | 0.872                         | 0.712                        |
| 475 | MULTICOM-refine    | 0.7543                    | 0.8808                        | 0.6483                       |
| 35  | Manifold-E         | 0.7508                    | 0.8525                        | 0.6657                       |
| 86  | MULTICOM_qa        | 0.7484                    | 0.8771                        | 0.6405                       |
| 158 | MULTICOM_deep      | 0.7474                    | 0.8772                        | 0.6387                       |
| 120 | MULTICOM_egnn      | 0.7456                    | 0.8759                        | 0.6365                       |
| 288 | DFolding-server    | 0.7427                    | 0.8584                        | 0.6457                       |
| 282 | GuijunLab-Threader | 0.7325                    | 0.8604                        | 0.6254                       |
| 166 | RaptorX            | 0.7303                    | 0.8564                        | 0.6247                       |
| 298 | MUFold             | 0.7267                    | 0.8707                        | 0.606                        |
| 383 | server_124         | 0.7265                    | 0.8589                        | 0.6155                       |
| 188 | GuijunLab-DeepDA   | 0.7257                    | 0.8643                        | 0.6096                       |
| 98  | GuijunLab-Assembly | 0.7241                    | 0.866                         | 0.6051                       |
| 353 | hFold              | 0.7231                    | 0.851                         | 0.6158                       |
| 125 | UltraFold_Server   | 0.721                     | 0.8689                        | 0.5972                       |
| 446 | Shennong           | 0.7173                    | 0.8747                        | 0.5855                       |
| 466 | ColabFold          | 0.7112                    | 0.8211                        | 0.6191                       |
| 462 | MultiFOLD          | 0.7074                    | 0.8683                        | 0.5726                       |
| 270 | NBIS-AF2-standard  | 0.6882                    | 0.7983                        | 0.5959                       |

**Supplementary Table 2.** The average TM-score of the top 1 model submitted by the top 20 server predictors for all 94 domains, 47 TBM domains and 47 FM and FM/TBM domains.

| Predictor ID | Server name     | Avg. TM-score on 94 domains | Avg. TM-score on 47 TBM domains | Avg. TM-score on 47 FM or FM/TBM domains |
|--------------|-----------------|-----------------------------|---------------------------------|------------------------------------------|
| 162          | UM-TBM          | 0.8824                      | 0.9253                          | 0.8395                                   |
| 229          | Yang-server     | 0.8763                      | 0.9171                          | 0.8354                                   |
| 475          | MULTICOM_refine | 0.8332                      | 0.9172                          | 0.7493                                   |
| 120          | MULTICOM_egnn   | 0.8298                      | 0.9086                          | 0.7511                                   |
| 158          | MULTICOM_deep   | 0.8289                      | 0.9098                          | 0.748                                    |
| 35           | Manifold-E      | 0.8289                      | 0.9098                          | 0.7479                                   |
| 86           | MULTICOM_qa     | 0.8286                      | 0.9092                          | 0.7479                                   |

|     |                    |        |        |        |
|-----|--------------------|--------|--------|--------|
| 166 | RaptorX            | 0.8228 | 0.9057 | 0.7398 |
| 288 | DFolding-server    | 0.8185 | 0.8996 | 0.7374 |
| 383 | server_124         | 0.8113 | 0.9115 | 0.7111 |
| 188 | GuijunLab-DeepDA   | 0.8055 | 0.9083 | 0.7027 |
| 298 | MUFold             | 0.8047 | 0.9039 | 0.7054 |
| 282 | GuijunLab-Threader | 0.8008 | 0.8953 | 0.7063 |
| 98  | GuijunLab-Assembly | 0.7988 | 0.8983 | 0.6992 |
| 125 | UltraFold_Server   | 0.7976 | 0.9039 | 0.6912 |
| 462 | MultiFOLD          | 0.7954 | 0.8994 | 0.6914 |
| 446 | Shennong           | 0.7916 | 0.8952 | 0.688  |
| 353 | hFold              | 0.7837 | 0.8875 | 0.68   |
| 466 | ColabFold          | 0.7731 | 0.8138 | 0.7323 |
| 270 | NBIS-AF2-standard  | 0.769  | 0.8503 | 0.6876 |

**Supplementary Table 3.** The average IDDT of the top 1 model submitted by the top 20 server predictors for all 94 domains, 47 TBM domains and 47 FM and FM/TBM domains.

| Predictor ID | Server name        | Avg. IDDT on 94 domains | Avg. IDDT on 47 TBM domains | Avg. IDDT on 47 FM or FM/TBM domains |
|--------------|--------------------|-------------------------|-----------------------------|--------------------------------------|
| 162          | UM-TBM             | 0.8149                  | 0.8533                      | 0.7764                               |
| 229          | Yang-server        | 0.7942                  | 0.8337                      | 0.7546                               |
| 475          | MULTICOM_refine    | 0.7934                  | 0.8529                      | 0.7338                               |
| 120          | MULTICOM_egnn      | 0.7902                  | 0.848                       | 0.7323                               |
| 158          | MULTICOM_deep      | 0.7901                  | 0.8489                      | 0.7312                               |
| 86           | MULTICOM_qa        | 0.789                   | 0.8488                      | 0.7292                               |
| 166          | RaptorX            | 0.7881                  | 0.8491                      | 0.7271                               |
| 383          | server_124         | 0.778                   | 0.8495                      | 0.7065                               |
| 288          | DFolding-server    | 0.7769                  | 0.8404                      | 0.7135                               |
| 298          | MUFold             | 0.7757                  | 0.8477                      | 0.7037                               |
| 35           | Manifold-E         | 0.774                   | 0.8414                      | 0.7067                               |
| 98           | GuijunLab-Assembly | 0.7729                  | 0.8429                      | 0.7029                               |
| 188          | GuijunLab-DeepDA   | 0.7719                  | 0.8455                      | 0.6984                               |
| 282          | GuijunLab-Threader | 0.7699                  | 0.8375                      | 0.7022                               |
| 125          | UltraFold_Server   | 0.7684                  | 0.8415                      | 0.6952                               |
| 446          | Shennong           | 0.7681                  | 0.8409                      | 0.6954                               |
| 462          | MultiFOLD          | 0.767                   | 0.8421                      | 0.6918                               |
| 353          | hFold              | 0.7558                  | 0.8275                      | 0.684                                |
| 466          | ColabFold          | 0.747                   | 0.768                       | 0.7259                               |
| 270          | NBIS-AF2-standard  | 0.7377                  | 0.7929                      | 0.6824                               |

**Supplementary Table 4.** The average TM-score of the top 1 model submitted by the top 20 server predictors on the 68 full-length targets, 31 TBM full-length targets and 37 FM full-length targets (a target is classified as a FM target if one of its domains is FM/TBM or FM domain).

| Predictor ID | Server name        | Avg. TM-score on 68 targets | Avg. TM-score on 31 TBM targets | Avg. TM-score on 37 FM targets |
|--------------|--------------------|-----------------------------|---------------------------------|--------------------------------|
| 162          | UM-TBM             | 0.8454                      | 0.9131                          | 0.7887                         |
| 229          | Yang-server        | 0.8366                      | 0.9049                          | 0.7794                         |
| 35           | Manifold-E         | 0.8060                      | 0.8865                          | 0.7386                         |
| 475          | MULTICOM-refine    | 0.8007                      | 0.9102                          | 0.7090                         |
| 288          | DFolding-server    | 0.7974                      | 0.8952                          | 0.7155                         |
| 158          | MULTICOM_deep      | 0.7959                      | 0.9076                          | 0.7023                         |
| 86           | MULTICOM_qa        | 0.7954                      | 0.9060                          | 0.7027                         |
| 120          | MULTICOM_egnn      | 0.7936                      | 0.9049                          | 0.7004                         |
| 282          | GuijunLab-Threader | 0.7865                      | 0.8931                          | 0.6971                         |
| 166          | RaptorX            | 0.7816                      | 0.8878                          | 0.6926                         |
| 383          | server_124         | 0.7771                      | 0.8929                          | 0.6801                         |
| 298          | MUFold             | 0.7759                      | 0.9043                          | 0.6684                         |
| 188          | GuijunLab-DeepDA   | 0.7753                      | 0.8953                          | 0.6747                         |
| 353          | hFold              | 0.7751                      | 0.8873                          | 0.6811                         |
| 98           | GuijunLab-Assembly | 0.7734                      | 0.8976                          | 0.6693                         |
| 125          | UltraFold_Server   | 0.7719                      | 0.9025                          | 0.6624                         |
| 446          | Shennong           | 0.7629                      | 0.9040                          | 0.6448                         |
| 466          | ColabFold          | 0.7552                      | 0.8400                          | 0.6842                         |
| 462          | MultiFOLD          | 0.7550                      | 0.9002                          | 0.6333                         |
| 270          | NBIS-AF2-standard  | 0.7373                      | 0.8299                          | 0.6598                         |

**Supplementary Table 5.** The average IDDT of the top 1 model submitted by the top 20 server predictors for the 68 full-length targets, 31 TBM full-length targets and 37 FM full-length targets (a target is classified as a FM target if one of its domains is FM/TBM or FM domain).

| Predictor ID | Server name     | Avg. IDDT on 68 targets | Avg. IDDT on 31 TBM targets | Avg. IDDT on 37 FM targets |
|--------------|-----------------|-------------------------|-----------------------------|----------------------------|
| 162          | UM-TBM          | 0.8184                  | 0.8587                      | 0.7846                     |
| 475          | MULTICOM-refine | 0.8081                  | 0.8583                      | 0.766                      |
| 120          | MULTICOM_egnn   | 0.8045                  | 0.8568                      | 0.7606                     |
| 158          | MULTICOM_deep   | 0.804                   | 0.859                       | 0.758                      |
| 86           | MULTICOM_qa     | 0.8031                  | 0.8579                      | 0.7572                     |
| 229          | Yang-server     | 0.8013                  | 0.8334                      | 0.7745                     |
| 166          | RaptorX         | 0.7989                  | 0.8497                      | 0.7564                     |
| 288          | DFolding-server | 0.7969                  | 0.8516                      | 0.7511                     |

|     |                    |        |        |        |
|-----|--------------------|--------|--------|--------|
| 282 | GuijunLab-Threader | 0.7941 | 0.8516 | 0.7459 |
| 35  | Manifold-E         | 0.7938 | 0.8406 | 0.7547 |
| 298 | MUFold             | 0.7925 | 0.8569 | 0.7386 |
| 98  | GuijunLab-Assembly | 0.7912 | 0.8571 | 0.736  |
| 383 | server_124         | 0.7905 | 0.8528 | 0.7383 |
| 188 | GuijunLab-DeepDA   | 0.7904 | 0.8538 | 0.7374 |
| 125 | UltraFold_Server   | 0.7872 | 0.8529 | 0.7321 |
| 353 | hFold              | 0.7872 | 0.8474 | 0.7368 |
| 446 | Shennong           | 0.785  | 0.858  | 0.724  |
| 462 | MultiFOLD          | 0.7752 | 0.8546 | 0.7087 |
| 466 | ColabFold          | 0.774  | 0.8005 | 0.7517 |
| 270 | NBIS-AF2-standard  | 0.7508 | 0.7918 | 0.7165 |

**Supplementary Table 6.** The comparison between MULTICOM\_refine and NBIS-AF2-standard on 65 full-length targets (36 FM targets and 29 TBM targets) in terms of average GDT-TS of top 1 models or best of five models. The p-value for the difference between MULTICOM\_refine and NBIS-AF2-standard is calculated by the one-sided Wilcoxon signed rank test.

| Domain type    | Top 1 Model       |                   |         | Best of five Models |                   |           |
|----------------|-------------------|-------------------|---------|---------------------|-------------------|-----------|
|                | MULTICOM_M_refine | NBIS-AF2-standard | p-value | MULTICOM_refine     | NBIS-AF2-standard | p-value   |
| All 65 targets | 0.7469            | 0.7200            | 0.02137 | 0.7684              | 0.7330            | 2.884e-05 |
| 36 FM targets  | 0.6411            | 0.6125            | 0.1481  | 0.6750              | 0.6278            | 0.0006163 |
| 29 TBM targets | 0.8781            | 0.8533            | 0.02788 | 0.8843              | 0.8635            | 0.01226   |

**Supplementary Table 7.** The comparison between the average GDT-TS of the original models and the average GDT-TS of the refined models on the 23 single-chain monomer targets. Bold font denotes a higher (or equal) average score.

| Target # | Avg GDT-TS of original models | Avg GDT-TS of refined models | Target # | Avg GDT-TS Of original models | Avg GDT-TS of refined models |
|----------|-------------------------------|------------------------------|----------|-------------------------------|------------------------------|
| T1104    | <b>0.78762</b>                | 0.78076                      | T1155    | <b>0.65482</b>                | 0.64564                      |
| T1112    | 0.78402                       | <b>0.79098</b>               | T1159    | <b>0.97594</b>                | 0.97436                      |
| T1120    | <b>0.5033</b>                 | <b>0.5033</b>                | T1162    | <b>0.96198</b>                | 0.96042                      |
| T1122    | <b>0.27074</b>                | 0.26596                      | T1163    | <b>0.96224</b>                | 0.95054                      |
| T1130    | <b>0.29308</b>                | 0.25032                      | T1175    | <b>0.92834</b>                | 0.914                        |

|       |                |                |       |                |                |
|-------|----------------|----------------|-------|----------------|----------------|
| T1131 | 0.18944        | <b>0.19782</b> | T1177 | 0.89196        | <b>0.89418</b> |
| T1133 | 0.94166        | <b>0.94974</b> | T1180 | 0.72928        | <b>0.88324</b> |
| T1139 | 0.8756         | <b>0.87626</b> | T1182 | <b>0.85726</b> | 0.78036        |
| T1145 | 0.74144        | <b>0.80566</b> | T1183 | <b>0.96204</b> | 0.95412        |
| T1146 | 0.94692        | <b>0.94836</b> | T1188 | 0.96684        | <b>0.96868</b> |
| T1147 | <b>0.99126</b> | 0.9864         | T1194 | <b>0.98786</b> | 0.9764         |
| T1150 | <b>0.9371</b>  | 0.9345         |       |                |                |

**Supplementary Table 8.** The average GDT-TS of the top 1 model for all 94 domains, 39 domains from 27 single-chain targets, and 55 domains from 41 targets belonging to protein assemblies predicted by our two human predictors (MULTICOM and MULTICOM\_human) and four server predictors (MULTICOM\_refine, MULTICOM\_egnn, MULTICOM\_deep, MULTICOM\_qa).

| Predictor       | Avg. GDT-TS on 94 domains | Avg. GDT-TS on 39 domains from 27 single-chain targets | Avg. GDT-TS on 55 domains from 41 targets belonging to assemblies |
|-----------------|---------------------------|--------------------------------------------------------|-------------------------------------------------------------------|
| MULTICOM        | <b>0.8073</b>             | 0.7520                                                 | <b>0.8464</b>                                                     |
| MULTICOM_human  | 0.8057                    | 0.7520                                                 | 0.8438                                                            |
| MULTICOM_refine | 0.7964                    | 0.7538                                                 | 0.8266                                                            |
| MULTICOM_egnn   | 0.793                     | 0.7513                                                 | 0.8225                                                            |
| MULTICOM_deep   | 0.7922                    | <b>0.7541</b>                                          | 0.8192                                                            |
| MULTICOM_qa     | 0.7917                    | 0.7438                                                 | 0.8256                                                            |

**Supplementary Table 9.** The ratio of models with correct topology (TM-score > 0.5) in the model pool predicted by the single-chain structure prediction for 29 TBM targets and 36 FM targets. The targets with a low ratio (< 0.1) are highlighted in bold font.

| TBM targets |                         |            |                         | FM and FM/TBM targets |                         |                |                         |
|-------------|-------------------------|------------|-------------------------|-----------------------|-------------------------|----------------|-------------------------|
| Target No.  | Ratio of correct models | Target No. | Ratio of correct models | Target No.            | Ratio of correct models | Target No.     | Ratio of correct models |
| T1106s2     | 1                       | T1152      | 1                       | T1104                 | 0.93                    | <b>T1137s6</b> | <b>0.06</b>             |
| T1109       | 1                       | T1153      | 1                       | T1106s1               | 1                       | T1145          | 1                       |
| T1110       | 1                       | T1157s1    | 1                       | T1112                 | 1                       | T1150          | 1                       |
| T1119       | 1                       | T1157s2    | 1                       | T1113                 | 1                       | T1151s2        | 1                       |

|         |   |              |          |                |             |       |        |
|---------|---|--------------|----------|----------------|-------------|-------|--------|
| T1124   | 1 | T1158        | 1        | T1120          | 0.94        | T1154 | 0.69   |
| T1127   | 1 | <b>T1160</b> | <b>0</b> | T1121          | 1           | T1155 | 1      |
| T1132   | 1 | <b>T1161</b> | <b>0</b> | <b>T1122</b>   | <b>0.02</b> | T1159 | 1      |
| T1133   | 1 | T1162        | 1        | T1123          | 0.9         | T1169 | 0.73   |
| T1134s1 | 1 | T1163        | 1        | <b>T1125</b>   | <b>0</b>    | T1173 | 0.42   |
| T1137s7 | 1 | T1170        | 1        | T1129s2        | 1           | T1174 | 0.98   |
| T1137s8 | 1 | T1175        | 1        | <b>T1130</b>   | <b>0</b>    | T1177 | 1      |
| T1137s9 | 1 | T1180        | 1        | <b>T1131</b>   | <b>0</b>    | T1178 | 0.83   |
| T1139   | 1 | T1183        | 1        | T1134s2        | 1           | T1179 | 0.92   |
| T1146   | 1 | T1188        | 1        | <b>T1137s1</b> | <b>0</b>    | T1181 | 1      |
| T1147   | 1 |              |          | <b>T1137s2</b> | <b>0</b>    | T1182 | 1      |
|         |   |              |          | <b>T1137s3</b> | <b>0</b>    | T1184 | 1      |
|         |   |              |          | <b>T1137s4</b> | <b>0</b>    | T1187 | 1      |
|         |   |              |          | T1137s5        | 0.22        | T1194 | 1      |
| Average |   |              | 0.9310   |                |             |       | 0.6846 |

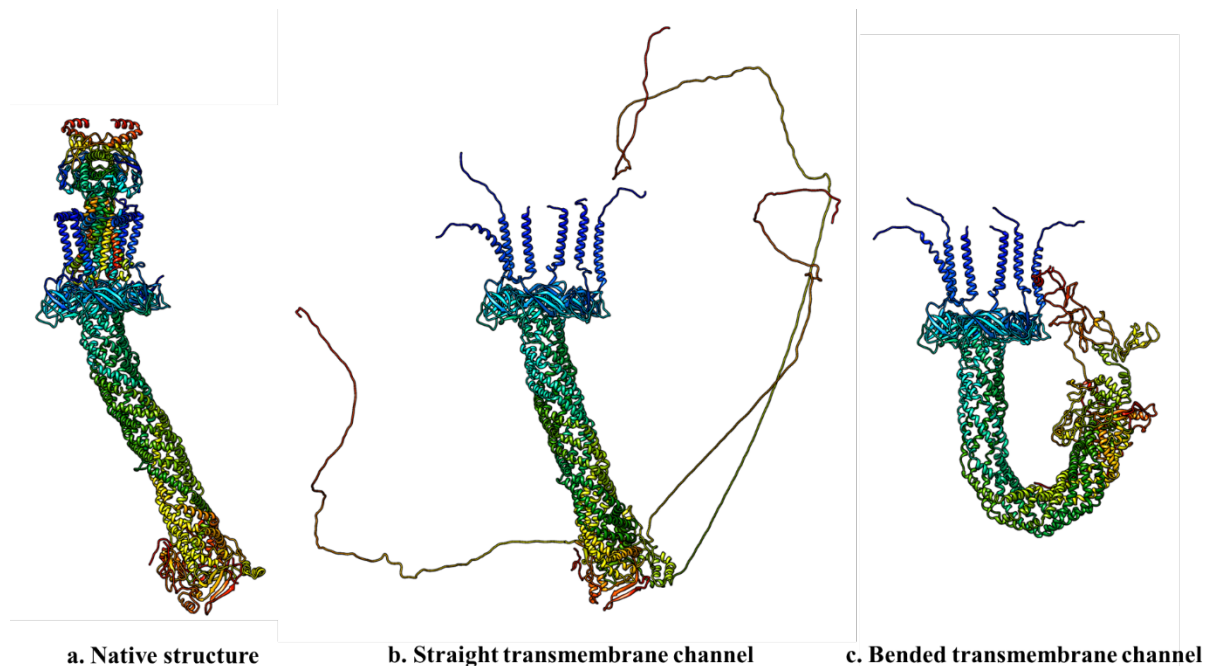

**Supplementary Figure 1.** (a) The native structure for H1137 consisting of 9 different chains (stoichiometry: A1B1C1D1 E1F1G2H1I1); (b) The predicted, straight complex structure (transmembrane channel) formed by the six chains (T1137s1-T1137s6) of H1137; and (c) The predicted, bended complex structure for the six chains (T1137s1-T1137s6) of H1137. The long extended coil in (b) and (c) are disordered residues that do not exist in the native structure. It may be useful to trim the disordered residue prior to predict the structure of the six chains as demonstrated by Yang-Server. Overall, the similarity between (b) and (a) is higher than between (c) and (a). Therefore, the tertiary structures of the six chains in (b) are more similar to the native structures than those in (c).

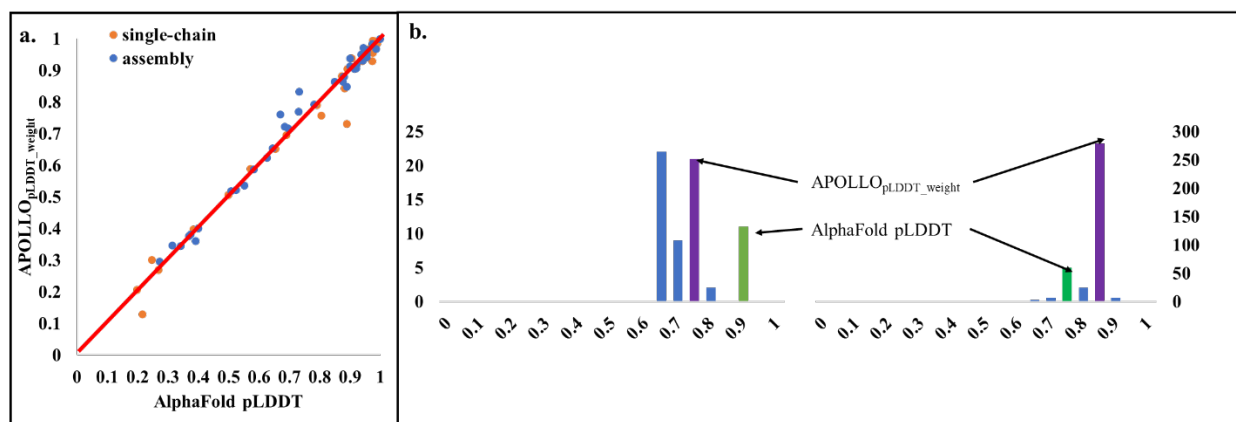

**Supplementary Figure 2.** (a) The GDT-TS of selected top1 model from AlphaFold2 pLDDT score plotted against that of APOLLO<sub>pLDDT\_weight</sub> on 68 targets of human\_model\_dataset. (b) The distribution of true GDT-TS scores of models for T1180 (left) and T1106s1 (right). The bin from which the top 1 model selected by AlphaFold2 pLDDT and APOLLO<sub>pLDDT\_weight</sub> is highlighted in green and purple, respectively. AlphaFold2 pLDDT selected a good model for T1180 but a bad model for T1106s1, while APOLLO<sub>pLDDT\_weight</sub> selected a good model for T1161s1 but a bad model for T1180.

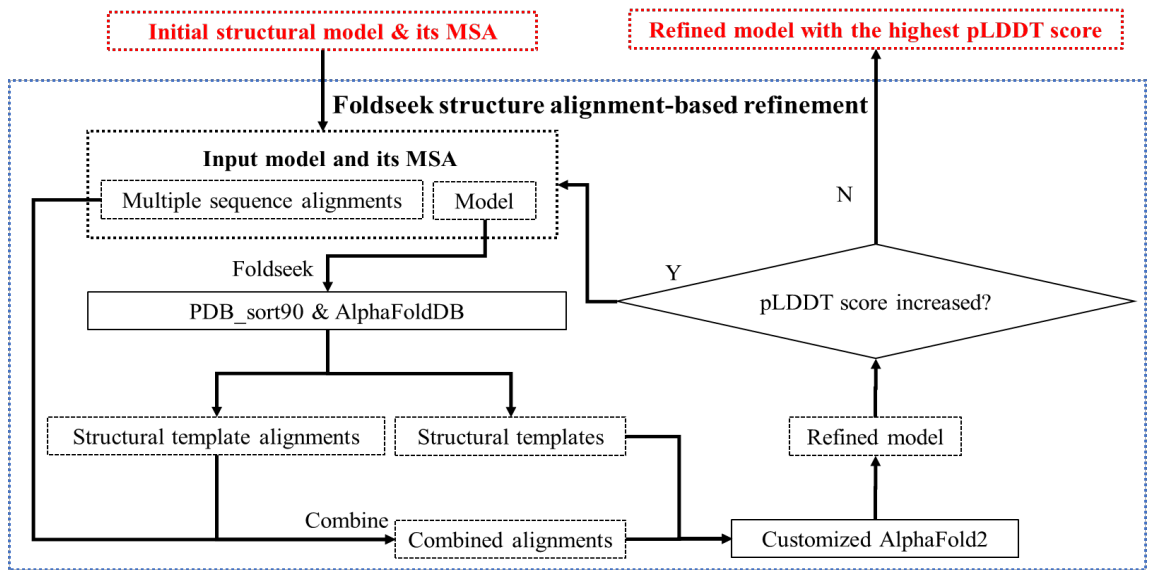

**Supplementary Figure 3.** The workflow of the Foldseek-based refinement method.
